# Supplementary material
Source: publisher figshare collection journal article supplement (https://sage.figshare.com/ndownloader/files/15086204)

**Appendices:**

| Table 1- Self-stated PWT (percent of shift time in nurses' point of view) in general hospitals. Sorted by hospital scale(N>F>A)                                                                                                                                                                                                                                                                                   |                   |          |       |          |        |           |         |
|-------------------------------------------------------------------------------------------------------------------------------------------------------------------------------------------------------------------------------------------------------------------------------------------------------------------------------------------------------------------------------------------------------------------|-------------------|----------|-------|----------|--------|-----------|---------|
|                                                                                                                                                                                                                                                                                                                                                                                                                   | General hospitals |          |       |          |        |           | Pvalue* |
|                                                                                                                                                                                                                                                                                                                                                                                                                   | N                 |          | F     |          | A      |           |         |
|                                                                                                                                                                                                                                                                                                                                                                                                                   | **                | ***      | **    | ***      | **     | ***       |         |
| Time wasted for waiting in ward <sup>1</sup>                                                                                                                                                                                                                                                                                                                                                                      | 9±1.5             | 3(0-13)  | 11±10 | 11(4-17) | 12.5±8 | 15(3-19)  | 0.25    |
| Time wasted by searching for needed equipment <sup>2</sup>                                                                                                                                                                                                                                                                                                                                                        | 9±15              | 3(0-11)  | 10±14 | 5(1-10)  | 15±13  | 11(8-33)  | 0.13    |
| Time wasted by transferring in ward <sup>3</sup>                                                                                                                                                                                                                                                                                                                                                                  | 9±1.5             | 3(0-11)  | 10±14 | 5(1-10)  | 15±13  | 11(8-33)  | 0.13    |
| Total time wasted                                                                                                                                                                                                                                                                                                                                                                                                 | 27±34             | 17(1-33) | 32±35 | 20(9-39) | 43±32  | 40(19-83) | 0.18    |
| <p>* Chi square test was applied.</p> <p>** data expressed as Mean± SD</p> <p>*** data expressed as Median±IQR</p> <p>1- Time spent for waiting in ward(time waiting for lab data responses, transfer of patients or delivery of care)</p> <p>2- Time wasted by searching for needed equipment</p> <p>3- Time wasted by transferring in ward-between patients room or between patients room and nurse station</p> |                   |          |       |          |        |           |         |

Table 2- PWT (percentage of the shift time in the nurses' point of view) in 3 major sub-speciality hospitals. Mean  $\pm$ SD(median) = sort by hospital scale(R>C>K)

|                                                  | Sub special hospitals |          |             |          |             |           | Pvalue* |
|--------------------------------------------------|-----------------------|----------|-------------|----------|-------------|-----------|---------|
|                                                  | R                     |          | C           |          | K           |           |         |
|                                                  | **                    | ***      | **          | ***      | **          | ***       |         |
| Time wasted for waiting in ward <sup>1</sup>     | 10 $\pm$ 11           | 11(1-14) | 5 $\pm$ 5   | 2(0-8)   | 4 $\pm$ 5   | 3(1-5)    | 0.56    |
| Time wasted by searching for needed equipment    | 9 $\pm$ 8             | 7(1-11)  | 5 $\pm$ 7   | 3(0-7)   | 3 $\pm$ 3   | 3(1-5)    | 0.92    |
| Time wasted by transferring in ward <sup>2</sup> | 9 $\pm$ 8             | 7(1-11)  | 5 $\pm$ 7   | 4(0-7)   | 3 $\pm$ 3   | 3(1-5)    | 0.92    |
| Total time wasted                                | 28 $\pm$ 25           | 25(6-42) | 15 $\pm$ 18 | 11(2-29) | 11 $\pm$ 10 | 9.3(1-16) | 0.96    |

\* Chi square test was applied.

\*\* data expressed as Mean $\pm$  SD

\*\*\* data expressed as Median $\pm$  IQR

- 1- Time spent for waiting in ward(time waiting for lab data responses, transfer of patients or delivery of care)
- 2- Time wasted by transferring in ward-between patients room or between patients room and nurse station



Table 3- PWT (percentage of the shift time (self-stated in physicians' point of view) in general hospitals. Mean  $\pm$ SD(median) = sort by hospital scale(N>F>A>D)

|                                                                    | General hospitals |            |             |           |             |          |             |           |             |
|--------------------------------------------------------------------|-------------------|------------|-------------|-----------|-------------|----------|-------------|-----------|-------------|
|                                                                    | N                 |            | F           |           | A           |          | D           |           | Pvalue<br>* |
|                                                                    | **                | ***        | **          | ***       | **          | ***      | **          | ***       |             |
| Time wasted for waiting in ward <sup>1</sup>                       | 38 $\pm$ 29       | 43(14-57)  | 23 $\pm$ 34 | 10(0-59)  | 28 $\pm$ 40 | 28(0-57) | 17 $\pm$ 21 | 14(0-39)  | 0.75        |
| Time wasted by searching for needed equipment <sup>2</sup>         | 14 $\pm$ 16       | 14(0-36)   | 13 $\pm$ 17 | 9(0-31)   | 1 $\pm$ 1   | 1(0-1.5) | 18 $\pm$ 23 | 10(0-43)  | 0.41        |
| Time wasted by transferring in ward <sup>3</sup>                   | 14 $\pm$ 18       | 3(0-36)    | 9 $\pm$ 18  | 0(0-27)   | 0 $\pm$ 0   | 0        | 4 $\pm$ 4   | 3(0-8)    | 0.77        |
| Time wasted by transferring between ward and restroom <sup>4</sup> | 8 $\pm$ 16        | 0.5(0-7.5) | 18 $\pm$ 21 | 18(0-36)  | 3.5 $\pm$ 5 | 3.5(0-7) | 5 $\pm$ 7   | 3(0-13)   | 0.34        |
| Total time wasted                                                  | 75 $\pm$ 74       | 43(21-136) | 64 $\pm$ 75 | 56(0-135) | 32 $\pm$ 46 | 32(0-65) | 45 $\pm$ 54 | 37(0-100) | 0.58        |

\* Chi square test was applied.

\*\* data expressed as Mean $\pm$  SD

\*\*\* data expressed as Median $\pm$ IQR

- 1- Time spent for waiting in ward(time waiting for lab data responses, transfer of patients or delivery of care)
- 2- Time wasted by searching for needed equipment
- 3- Time wasted by transferring in ward-between patients room or between patients room and nurse station



Table 4- PWT (percentage of shift time physicians' view) in 4 major sub-special hospitals Mean  $\pm$ SD(median) = sort by hospital scale (R>C>K> G)

|                                                                    | Sub special hospitals |                |                 |                  |                 |                 |                |               | Pvalue* |
|--------------------------------------------------------------------|-----------------------|----------------|-----------------|------------------|-----------------|-----------------|----------------|---------------|---------|
|                                                                    | R                     |                | C               |                  | K               |                 | G              |               |         |
|                                                                    | **                    | ***            | **              | ***              | **              | ***             | **             | ***           |         |
| Time wasted for waiting in ward <sup>1</sup>                       | 35 $\pm$ 50           | 35(0-71)       | 46 $\pm$ 1<br>5 | 46(35-<br>57)    | 28 $\pm$ 4<br>9 | 0(0-85)         | 50 $\pm$<br>10 | 50(42-<br>57) | 0.29    |
| Time wasted by searching for needed equipment <sup>2</sup>         | 21 $\pm$ 30           | 21(0-42)       | 36 $\pm$ 4<br>1 | 36(7-<br>65)     | 60 $\pm$ 2<br>0 | 72(36-<br>72)   | 0 $\pm$ 0      | 0             | 0.13    |
| Time wasted by transferring in ward <sup>3</sup>                   | 30 $\pm$ 17           | 30(18-<br>42)  | 25 $\pm$ 5      | 25(21-<br>29)    | 25 $\pm$ 9      | 21(18-<br>36)   | 32 $\pm$<br>5  | 33(28-<br>36) | 0.36    |
| Time wasted by transferring between ward and restroom <sup>4</sup> | 0                     | 0              | 20 $\pm$ 2      | 20(18-<br>21)    | 18 $\pm$ 1<br>8 | 18(0-36)        | 0 $\pm$ 0      | 0             | 0.37    |
| Total time wasted                                                  | 87 $\pm$ 63           | 87(42-<br>132) | 128 $\pm$<br>28 | 128(108<br>-148) | 132 $\pm$<br>54 | 108(94-<br>194) | 82 $\pm$<br>15 | 82(71-<br>93) | 0.33    |

\* Chi square test was applied.

\*\* data expressed as Mean $\pm$  SD

\*\*\* data expressed as Median $\pm$ IQR

- 1- Time spent for waiting in ward(time waiting for lab data responses, transfer of patients or delivery of care)
- 2- Time wasted by searching for needed equipment
- 3- Time wasted by transferring in ward-between patients room or between patients room and nurse station
- 4- Time wasted by transferring between ward and physicians' rest room

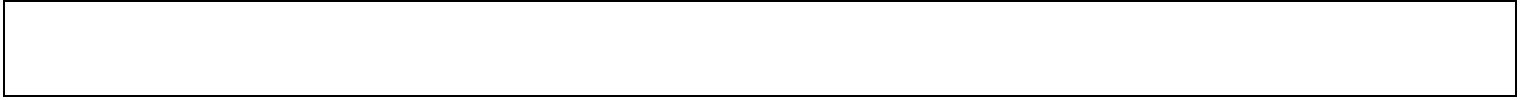

Supplement: Supplementary file 1 [file 15086204]
